# Supplementary material for: A multinational survey on the infrastructural quality of paediatric intensive care units
Source: Springer Nature journal article supplement (doi:10.1186/s13613-018-0451-1), 2018-11-06
Supplement: MOESM1 [file 16255518]

**GENERAL INFORMATION ABOUT YOUR PAEDIATRIC INTENSIVE CARE UNIT (PICU)**

1.) How many patients do you treat in your ICU ward annually?

N=.....

2.) What is the mean duration that patients stay on your ICU (in days)?

.....days

3.) Does your centre perform organ transplantations?

yes

no

4.) How many per cent of the patients on your ICU ward could also be treated in an intermediate care unit (IMCU) annually?

.....%

**PART I – INFRASTRUCTURE**

1.) **How many beds does your ICU have (number of beds)?**

N=.....

2.) **How are these beds distributed (insert number of each subcategory; if answers are not applicable please insert 0)?**

|                   |         |
|-------------------|---------|
| Rooms with 1 bed  | N=..... |
| Rooms with 2 beds | N=..... |
| Rooms with 3 beds | N=..... |
| Rooms with 4 beds | N=..... |
| Other             | N=..... |

3.) **How many rooms of the following specifications do you have on your ICU ward? (number of rooms; if none please enter 0)**

Rooms to isolate immunosuppressed patients (rooms class I with patient sluice – sluice has under-pressure to patient room and overpressure to hall/corridor): N=.....

Rooms to isolate patients with communicable diseases (rooms class II with patient sluice – sluice has overpressure to patient room and under-pressure to hall/corridor; HEPA filter installed): N=.....

Isolation rooms (class I or II, sluice with under-pressure on both sides of the sluice; HEPA filter installed): N=.....

4.) **Do you have a designated procedures room for small surgical interventions?**

- yes
- no

5.) **How much time does it take to reach the operating room (theatre) of your department/hospital from your ICU (in minutes; if answers are not applicable in your centre please answer with N/A)?**

.....min

6.) **How much time does it take to reach the emergency department of your department/hospital from your ICU (in minutes; if answers are not applicable in your centre please answer with N/A)?**

.....min

7.) **How much time does it take to reach the recovery room of your department/hospital from your ICU (in minutes; if answers are not applicable in your centre please answer with N/A)?**

.....min

8.) **How much time does it take to reach the radiology department of your department/hospital from your ICU (in minutes; if answers are not applicable in your centre please answer with N/A)?**

.....min

9.) **How much time does it take to reach the shock room of your department/hospital from your ICU (in minutes; if answers are not applicable in your centre please answer with N/A)?**

.....min

**PART II – DIAGNOSTIC AND THERAPEUTIC EQUIPMENT**

**Which of the following equipment is available on your ICU (please enter the number of available equipment)?**

|      |                                                            | N= |
|------|------------------------------------------------------------|----|
| 1.)  | How many of your beds are equipped with an ICU ventilator? |    |
| 2.)  | Breathing trainer(s)                                       |    |
| 3.)  | Transport ventilator(s)                                    |    |
| 4.)  | Blood gas analyzer(s)                                      |    |
| 5.)  | Bronchoscope(s)                                            |    |
| 6.)  | Ultrasound machine(s)                                      |    |
| 7.)  | Haemodialysis                                              |    |
| 8.)  | Cooling/Rewarming device(s)                                |    |
| 9.)  | Defibrillator(s)                                           |    |
| 10.) | Mobile X-ray                                               |    |
| 11.) | EEG/CFM/BIS                                                |    |
| 12.) | PDMS                                                       |    |
| 13.) | Monitoring device(s)                                       |    |

**PART III – PERSONNEL:**

- 1.) Which specialty or specialties (multiple answers allowed) is the head of your PICU ward trained in (please tick correct box(es))?
- Paediatrics
  - Paediatric Surgery
  - Anaesthesiology
  - Other
- 2.) Does the head of your Department hold an additional diploma in intensive care medicine (please tick correct box)?
- yes
  - no
- 3.) How much of his/her time (in percent) does the head of your PICU ward spend on patient care (please tick correct box)?
- approximately 25%
  - approximately 50%
  - approximately 75%
  - approximately 100%
- 4.) How many medical doctors work on your PICU ward (including head and deputy)?
- N=.....
- 5.) How many consultants do you employ on your PICU?
- N=.....
- 6.) How many of your medical doctors have an additional diploma in intensive care medicine?
- N=.....
- 7.) How many of your MDs have a training > 6 months in paediatric intensive care medicine?
- N=.....
- 8.) Did the head nurse of your ICU ward receive special training in intensive care medicine?
- yes
  - no
- 9.) Is the head nurse of your ICU ward also involved in patient treatment?
- yes
  - no
- 10.) What is the percentage of nurses with intensive care training in relation to all nursing personnel of your PICU ward?
- .....%
- 11.) For how many patients is a nurse of your PICU ward responsible in the morning shift?
- N=.....
- 12.) For how many patients is a nurse of your PICU ward responsible in the day shift?

N=.....

**13.) For how many patients is a nurse of your PICU ward responsible in the night shift?**

N=.....

**14.) Do you have a psychotherapist involved in patient care on your ICU ward?**

- yes
- no

## **PART IV – ORGANIZATION AND QUALITY IMPROVEMENT**

**1.) Do you have written SOPs for admission, transfer and discharge of ICU patients?**

- yes
- no

**2.) Does your ICU ward take part in external quality comparisons?**

- yes
- no

**3.) Do you provide an internal system for quality control/quality management on your ICU?**

- yes
- no

**4.) Do you apply a weaning protocol?**

- yes
- no

**5.) Does your centre offer permanent presence of a paediatric department**

- yes
- no

**6.) Does your centre offer permanent presence of a paediatric surgery department**

- yes
- no

**7.) Does your centre offer permanent presence of a radiology department?**

- yes
- no

**8.) Does your centre offer permanent presence of a blood bank?**

- yes
- no

**9.) Does your centre offer presence (at least on call) of a neuro-paediatrician?**

- yes
- no

**10.) Does your centre offer (at least on call) of an emergency endoscopy team?**

- yes
- no

**11.) Is an MRI available at your centre 24/7?**

- yes
- no

**12.) Is microbiology available at your centre 24/7?**

- yes
- no

**13.) Does your centre offer permanent presence of a neurosurgeon?**

- yes
- no

**14.) Does your centre offer permanent presence of a paediatric nephrologist?**

- yes
- no

**15.) Does your centre offer permanent presence of a cardio-thoracic surgeon?**

- yes
- no

**16.) Does your centre offer permanent presence of a trauma surgeon?**

- yes
- no

**17.) Do you apply standard operating procedures (SOPs)?**

- yes
- no
